# Supplementary material for: Induction of Premature Cell Senescence Stimulated by High Doses of Antioxidants Is Mediated by Endoplasmic Reticulum Stress
Source: MDPI journal article supplement (doi:10.3390/ijms222111851), 2021-10-31
Supplement: s1 [file s1]

Table S1. Set of significant (p-value  $\leq 0.1$ , Bonferroni correction) differentially expressed genes common for Tempol and resveratrol groups (referred to as AO-DEG list).

| N  | Gene symbol | Gene full name                                        | Fold change (Tempol) | Fold change (Resveratrol) | Pathway (REACTOME)                                             | Pathway Category (REACTOME)            |
|----|-------------|-------------------------------------------------------|----------------------|---------------------------|----------------------------------------------------------------|----------------------------------------|
| 1  | PDK2        | Pyruvate Dehydrogenase Kinase 2                       | 0.51                 | 0.51                      | The citric acid (TCA) cycle and respiratory electron transport | Metabolism                             |
| 2  | NADK        | NAD Kinase                                            | 0.75                 | 0.7                       | Nicotinate metabolism                                          | Metabolism                             |
| 3  | GOPC        | Golgi Associated PDZ And Coiled-Coil Motif Containing | 1.3                  | 1.93                      | RHO GTPases regulate CFTR trafficking                          | Signal Transduction                    |
| 4  | ANAPC4      | Anaphase Promoting Complex Subunit 4                  | 4.17                 | 5.76                      | Mitotic Metaphase and Anaphase                                 | Cell Cycle                             |
|    |             |                                                       |                      |                           | Cell Cycle Checkpoints                                         | Cell Cycle                             |
|    |             |                                                       |                      |                           | Synthesis of DNA                                               | DNA Replication                        |
|    |             |                                                       |                      |                           | Senescence-Associated Secretory Phenotype (SASP)               | Cellular responses to external stimuli |
| 5  | MTFR1       | Mitochondrial Fission Regulator 1                     | 5.05                 | 4.71                      | Release of apoptotic factors from the mitochondria             | Programmed Cell Death                  |
| 6  | MLTK        | Mitogen-Activated Protein Kinase Kinase Kinase 20     | 2.54                 | 2.67                      | ERK/MAPK targets                                               | Signal Transduction                    |
|    |             |                                                       |                      |                           | Deactivation of the beta-catenin transactivating complex       | Signal Transduction                    |
|    |             |                                                       |                      |                           | KSRP (KHSRP) binds and destabilizes mRNA                       | Metabolism of RNA                      |
| 7  | GADD45B     | Growth Arrest And DNA Damage Inducible Beta           | 6.58                 | 11.34                     | TP53 Regulates Transcription of Cell Cycle Genes               | Gene expression (Transcription)        |
|    |             |                                                       |                      |                           | FOXO-mediated transcription of cell cycle genes                | Gene expression (Transcription)        |
| 8  | CABIN1      | Calcineurin Binding Protein 1                         | 0.11                 | 0.09                      | DNA Damage/Telomere Stress Induced Senescence                  | Cellular responses to external stimuli |
| 9  | SRRD        | SRR1 Domain Containing                                | 3.08                 | 3.94                      | NA                                                             | NA                                     |
| 10 | XBP1        | X-Box Binding Protein 1                               | 2.32                 | 2.13                      | XBP1(S) activates chaperone genes                              | Metabolism of proteins                 |
|    |             |                                                       |                      |                           | Unfolded Protein Response (UPR)                                | Metabolism of proteins                 |
| 11 | CDK5RAP1    | CDK5 Regulatory Subunit Associated Protein 1          | 0.68                 | 0.75                      | NA                                                             | NA                                     |
| 12 | MAGT1       | Magnesium Transporter 1                               | 32.03                | 40.88                     | Asparagine N-linked glycosylation                              | Metabolism of proteins                 |
|    |             |                                                       |                      |                           | Miscellaneous transport and binding events                     | Transport of small molecules           |

|    |          |                                                               |      |      |                                                                                                                    |                                 |
|----|----------|---------------------------------------------------------------|------|------|--------------------------------------------------------------------------------------------------------------------|---------------------------------|
| 13 | SLC39A14 | Solute Carrier Family 39 Member 14                            | 1.75 | 1.36 | Transport of bile salts and organic acids, metal ions and amine compounds                                          | Transport of small molecules    |
| 14 | CCNE1    | Cyclin E1                                                     | 1.5  | 2.24 | Mitotic G1 phase and G1/S transition                                                                               | Cell Cycle                      |
|    |          |                                                               |      |      | Synthesis of DNA                                                                                                   | DNA Replication                 |
| 15 | COPE     | COPI Coat Complex Subunit Epsilon                             | 2.21 | 2.96 | COPI-mediated anterograde transport                                                                                | Vesicle-mediated transport      |
|    |          |                                                               |      |      | Intra-Golgi and retrograde Golgi-to-ER traffic                                                                     | Vesicle-mediated transport      |
| 16 | SEC61B   | SEC61 Translocon Subunit Beta                                 | 0.83 | 0.8  | Insertion of tail-anchored proteins into the endoplasmic reticulum membrane                                        | Protein localization            |
|    |          |                                                               |      |      | SRP-dependent cotranslational protein targeting to membrane                                                        | Metabolism of proteins          |
| 17 | DUSP3    | Dual Specificity Phosphatase 3                                | 1.19 | 0.9  | MAPK targets/ Nuclear events mediated by MAP kinases                                                               | NA                              |
| 18 | NDUFC1   | NADH:Ubiquinone Oxidoreductase Subunit C1                     | 0.61 | 0.62 | Respiratory electron transport, ATP synthesis by chemiosmotic coupling and heat production by uncoupling proteins. | Metabolism                      |
| 19 | CHD4     | Chromodomain Helicase DNA Binding Protein 4                   | 0.71 | 0.71 | PTEN Regulation                                                                                                    | Signal Transduction             |
|    |          |                                                               |      |      | NGF-stimulated transcription                                                                                       | Signal Transduction             |
|    |          |                                                               |      |      | Chromatin organization                                                                                             | Chromatin organization          |
|    |          |                                                               |      |      | RNA Polymerase I Transcription                                                                                     | Gene expression (Transcription) |
|    |          |                                                               |      |      | ERCC6 (CSB) and EHMT2 (G9a) positively regulate rRNA expression                                                    | Gene expression (Transcription) |
|    |          |                                                               |      |      | Regulation of TP53 Activity through Acetylation                                                                    | Gene expression (Transcription) |
| 20 | TIMMDC1  | Translocase Of Inner Mitochondrial Membrane Domain Containing | 2.53 | 3.09 | Respiratory electron transport, ATP synthesis by chemiosmotic coupling and heat production by uncoupling proteins. | Metabolism                      |

|    |         |                                                        |      |      |                                                        |                                 |
|----|---------|--------------------------------------------------------|------|------|--------------------------------------------------------|---------------------------------|
| 21 | RNF7    | Ring Finger Protein 7                                  | 0.67 | 0.76 | Neddylation                                            | Metabolism of proteins          |
| 22 | CDC20   | Cell Division Cycle 20                                 | 0.41 | 0.15 | RHO GTPases Activate Formins                           | Signal Transduction             |
|    |         |                                                        |      |      | Mitotic Prometaphase                                   | Cell Cycle                      |
|    |         |                                                        |      |      | Mitotic Metaphase and Anaphase                         | Cell Cycle                      |
| 23 | MLH3    | MutL Homolog 3                                         | 0.24 | 0.24 | Meiotic recombination                                  | Cell Cycle                      |
| 24 | UBIAD1  | UbiA Prenyltransferase Domain Containing 1             | 0.72 | 0.8  | Metabolism of vitamin K                                | Metabolism                      |
| 25 | PYROXD1 | Pyridine Nucleotide-Disulphide Oxidoreductase Domain 1 | 4    | 3.75 | NA                                                     | NA                              |
| 26 | VAPB    | VAMP Associated Protein B And C                        | 2.6  | 1.79 | Sphingolipid metabolism                                | Metabolism                      |
| 27 | NUP85   | Nucleoporin 85                                         | 0.68 | 0.54 | Mitotic Prometaphase                                   | Cell Cycle                      |
|    |         |                                                        |      |      | Mitotic Metaphase and Anaphase                         | Cell Cycle                      |
|    |         |                                                        |      |      | RHO GTPases Activate Formins                           | Signal Transduction             |
|    |         |                                                        |      |      | Glucose metabolism                                     | Metabolism                      |
|    |         |                                                        |      |      | Gene Silencing by RNA                                  | Gene expression (Transcription) |
| 28 | UBR4    | Ubiquitin Protein Ligase E3 Component N-Recognin 4     | 1.52 | 1.33 | Class I MHC mediated antigen processing & presentation | Immune System                   |
| 29 | DNAJB9  | DnaJ Heat Shock Protein Family (Hsp40) Member B9       | 3.54 | 2.09 | XBP1(S) activates chaperone genes                      | Metabolism of proteins          |
| 30 | MPP1    | Membrane Palmitoylated Protein 1                       | 0.66 | 0.74 | Regulation of PLK1 Activity at G2/M Transition         | Cell Cycle                      |
|    |         |                                                        |      |      | Transcriptional Regulation by E2F6                     | Gene expression (Transcription) |
|    |         |                                                        |      |      | COPI-independent Golgi-to-ER retrograde traffic        | Vesicle-mediated transport      |
|    |         |                                                        |      |      | Sphingolipid de novo biosynthesis                      | Metabolism                      |
| 31 | ABCB7   | ATP Binding Cassette Subfamily B Member 7              | 3.38 | 6.9  | ABC-family proteins mediated transport                 | Transport of small molecules    |
|    |         |                                                        |      |      | Cytosolic iron-sulfur cluster assembly                 | Metabolism                      |
| 32 | MPRIIP  | Myosin Phosphatase Rho Interacting Protein             | 1.37 | 1.34 | NA                                                     | NA                              |
| 33 | POSTN   | Periostin                                              | 1.6  | 1.77 | NA                                                     | NA                              |
| 34 | STARD13 | StAR Related Lipid Transfer Domain Containing 13       | 0.14 | 0.12 | Signaling by Rho GTPases                               | Signal Transduction             |
| 35 | TESPA1  | Thymocyte Expressed, Positive Selection Associated 1   | 0.48 | 0.51 | NA                                                     | NA                              |

|    |         |                                                   |      |      |                                                               |                                 |
|----|---------|---------------------------------------------------|------|------|---------------------------------------------------------------|---------------------------------|
| 36 | HNRNPA1 | Heterogeneous Nuclear Ribonucleoprotein A1        | 0.63 | 0.64 | Processing of Capped Intron-Containing Pre-mRNA               | Metabolism of RNA               |
|    |         |                                                   |      |      | Signaling by FGFR2                                            | Signal Transduction             |
| 37 | KLHL36  | Kelch Like Family Member 36                       | 0.19 | 0.17 | NA                                                            | NA                              |
| 38 | PDCL    | Phosducin Like                                    | 1.62 | 2.22 | Protein folding                                               | Metabolism of proteins          |
| 39 | APTX    | Aprataxin                                         | 0.7  | 0.72 | UMOylation of DNA damage response and repair proteins         | Metabolism of proteins          |
|    |         |                                                   |      |      | SUMOylation of transcription factors                          | Metabolism of proteins          |
|    |         |                                                   |      |      | Regulation of TP53 Expression                                 | Gene expression (Transcription) |
|    |         |                                                   |      |      | Transcriptional Regulation by VENTX                           | Gene expression (Transcription) |
|    |         |                                                   |      |      | Downregulation of SMAD2/3:SMAD4 transcriptional activity      | Signal Transduction             |
| 40 | DUSP5   | Dual Specificity Phosphatase 5                    | 2.66 | 2.41 | RAF-independent MAPK1/3 activation                            | Signal Transduction             |
| 41 | TIMM23  | Translocase Of Inner Mitochondrial Membrane 23    | 0.7  | 0.69 | Mitochondrial protein import                                  | Protein localization            |
| 42 | IMPA2   | Inositol Monophosphatase 2                        | 1.21 | 1.53 | Inositol phosphate metabolism                                 | Metabolism                      |
| 43 | SRD5A1  | Steroid 5 Alpha-Reductase 1                       | 1.97 | 1.97 | Metabolism of steroid hormones                                | Metabolism                      |
| 44 | RSU1    | Ras Suppressor Protein 1                          | 1.48 | 1.63 | Cell junction organization                                    | Cell-Cell communication         |
| 45 | ADD3    | Adducin 3                                         | 0.4  | 0.33 | Miscellaneous transport and binding events                    | Transport of small molecules    |
| 46 | PKNOX1  | PBX/Knotted 1 Homeobox 1                          | 2.83 | 0.44 | NA                                                            | NA                              |
| 47 | MFSD8   | Major Facilitator Superfamily Domain Containing 8 | 3.46 | 4.09 | NA                                                            | NA                              |
| 48 | RPS14   | Ribosomal Protein S14                             | 0.76 | 0.78 | Eukaryotic Translation Initiation                             | Metabolism of proteins          |
|    |         |                                                   |      |      | Eukaryotic Translation Elongation                             | Metabolism of proteins          |
|    |         |                                                   |      |      | Eukaryotic Translation Termination                            | Metabolism of proteins          |
|    |         |                                                   |      |      | SRP-dependent cotranslational protein targeting to membrane   | Metabolism of proteins          |
|    |         |                                                   |      |      | Major pathway of rRNA processing in the nucleolus and cytosol | Metabolism of RNA               |
|    |         |                                                   |      |      | Nonsense-Mediated Decay (NMD)                                 | Metabolism of RNA               |

|    |          |                                     |      |      |                                                                       |                                        |
|----|----------|-------------------------------------|------|------|-----------------------------------------------------------------------|----------------------------------------|
|    |          |                                     |      |      | Selenoamino acid metabolism                                           | Metabolism                             |
|    |          |                                     |      |      | Response of EIF2AK4 (GCN2) to amino acid deficiency                   | Cellular responses to external stimuli |
|    |          |                                     |      |      | Signaling by ROBO receptors                                           | Developmental Biology                  |
| 49 | NGFRAP1  | Brain Expressed X-Linked 3          | 0.68 | 0.76 | p75 NTR receptor-mediated signalling                                  | Signal Transduction                    |
| 50 | TMEM170A | Transmembrane Protein 170A          | 2.15 | 2.1  | NA                                                                    | NA                                     |
| 51 | PLK1     | Polo Like Kinase 1                  | 0.44 | 0.15 | Mitotic Prometaphase                                                  | Cell Cycle                             |
|    |          |                                     |      |      | Mitotic Metaphase and Anaphase                                        | Cell Cycle                             |
|    |          |                                     |      |      | Mitotic G2-G2/M phases                                                | Cell Cycle                             |
|    |          |                                     |      |      | RHO GTPases Activate Formins                                          | Signal Transduction                    |
|    |          |                                     |      |      | Cilium Assembly                                                       | Organelle biogenesis and maintenance   |
| 52 | CTNNB1   | Catenin Beta 1                      | 1.91 | 3.34 | Transcriptional Regulation by VENTX                                   | Gene expression (Transcription)        |
|    |          |                                     |      |      | Transcriptional regulation by RUNX3 (RNA Polymerase II Transcription) | Gene expression (Transcription)        |
|    |          |                                     |      |      | TCF dependent signaling in response to WNT                            | Signal Transduction                    |
|    |          |                                     |      |      | Degradation of beta-catenin by the destruction complex                | Signal Transduction                    |
|    |          |                                     |      |      | Beta-catenin independent WNT signaling                                | Signal Transduction                    |
|    |          |                                     |      |      | RHO GTPases activate IQGAPs                                           | Signal Transduction                    |
|    |          |                                     |      |      | Signaling by VEGF                                                     | Signal Transduction                    |
|    |          |                                     |      |      | Apoptotic execution phase                                             | Programmed Cell Death                  |
|    |          |                                     |      |      | Incretin synthesis, secretion, and inactivation                       | Metabolism of proteins                 |
|    |          |                                     |      |      | Cell junction organization                                            | Cell-Cell communication                |
| 53 | SMIM4    | Small Integral Membrane Protein 4   | 2.7  | 7.08 | NA                                                                    | NA                                     |
| 54 | HIST1H1E | H1.4 Linker Histone, Cluster Member | 0.44 | 0.31 | DNA Damage/Telomere Stress Induced Senescence                         | Cellular responses to external stimuli |

|    |         |                                            |       |       |                                                                                                                                 |                                        |
|----|---------|--------------------------------------------|-------|-------|---------------------------------------------------------------------------------------------------------------------------------|----------------------------------------|
|    |         |                                            |       |       | Apoptotic execution phase                                                                                                       | Programmed Cell Death                  |
| 55 | SDC2    | Syndecan 2                                 | 1.74  | 1.64  | Regulation of Insulin-like Growth Factor (IGF) transport and uptake by Insulin-like Growth Factor Binding Proteins (IGFBP) (ER) | Metabolism of proteins                 |
|    |         |                                            |       |       | EPH-Ephrin signaling                                                                                                            | Developmental Biology                  |
|    |         |                                            |       |       | Glycosaminoglycan metabolism                                                                                                    | Metabolism                             |
| 56 | RPLP2   | Ribosomal Protein Lateral Stalk Subunit P2 | 0.74  | 0.78  | Eukaryotic Translation Initiation                                                                                               | Metabolism of proteins                 |
|    |         |                                            |       |       | Eukaryotic Translation Elongation                                                                                               | Metabolism of proteins                 |
|    |         |                                            |       |       | Eukaryotic Translation Termination                                                                                              | Metabolism of proteins                 |
|    |         |                                            |       |       | SRP-dependent cotranslational protein targeting to membrane                                                                     | Metabolism of proteins                 |
|    |         |                                            |       |       | Major pathway of rRNA processing in the nucleolus and cytosol                                                                   | Metabolism of RNA                      |
|    |         |                                            |       |       | Nonsense-Mediated Decay (NMD)                                                                                                   | Metabolism of RNA                      |
|    |         |                                            |       |       | Selenoamino acid metabolism                                                                                                     | Metabolism                             |
|    |         |                                            |       |       | Response of EIF2AK4 (GCN2) to amino acid deficiency                                                                             | Cellular responses to external stimuli |
|    |         |                                            |       |       | Signaling by ROBO receptors                                                                                                     | Developmental Biology                  |
| 57 | C5orf30 | Macrophage Immunometabolism Regulator      | 15.23 | 14.09 | TNFR1-induced NFkappaB signaling pathway                                                                                        | Signal Transduction                    |
|    |         |                                            |       |       | Regulation of TNFR1 signaling                                                                                                   | Signal Transduction                    |
| 58 | RTKN2   | Rhotekin 2                                 | 0.25  | 0.27  | RHO GTPases Activate Rhotekin and Rhophilins                                                                                    | Signal Transduction                    |
| 59 | TM2D3   | TM2 Domain Containing 3                    | 0.88  | 1.47  | NA                                                                                                                              | NA                                     |
| 60 | SP140L  | SP140 Nuclear Body Protein Like            | 0.34  | 0.39  | NA                                                                                                                              | NA                                     |
| 61 | MCRS1   | Microspherule Protein 1                    | 0.87  | 0.67  | Nucleotide Excision Repair                                                                                                      | DNA Repair                             |
|    |         |                                            |       |       | Deubiquitination                                                                                                                | Metabolism of proteins                 |
|    |         |                                            |       |       | Chromatin organization                                                                                                          | Chromatin organization                 |

|    |                |                                                             |       |       |                                                                             |                                        |
|----|----------------|-------------------------------------------------------------|-------|-------|-----------------------------------------------------------------------------|----------------------------------------|
| 62 | LAMTOR4        | Endosomal/Lysosomal Adaptor, MAPK And MTOR Activator        | 0.45  | 0.41  | mTOR signalling                                                             | Signal Transduction                    |
|    |                |                                                             |       |       | Energy dependent regulation of mTOR by LKB1-AMPK                            | Signal Transduction                    |
|    |                |                                                             |       |       | PTEN Regulation (PIP3 activates AKT signaling)                              | Signal Transduction                    |
|    |                |                                                             |       |       | Amino acids regulate mTORC1                                                 | Cellular responses to external stimuli |
|    |                |                                                             |       |       | Macroautophagy                                                              | Autophagy                              |
| 63 | TMEM63A        | Transmembrane Protein 63A                                   | 0.23  | 0.23  | Neutrophil degranulation                                                    | Immune System                          |
| 64 | HIST1H2AD      | H2A Clustered Histone 7                                     | 0.33  | 0.24  | SASP Pol1 Gene silencing SIRT1 rRNA DNAmethylation PRC2 Telomere DNA damage | NA                                     |
|    |                |                                                             |       |       | Amyloid fiber formation                                                     | Metabolism of proteins                 |
| 65 | ARHGAP11A      | Rho GTPase Activating Protein 11A                           | 2.84  | 1.98  | Signaling by Rho GTPases                                                    | Signal Transduction                    |
| 66 | TMEM199        | Transmembrane Protein 199                                   | 0.18  | 0.17  | trans-Golgi Network Vesicle Budding                                         | NA                                     |
| 67 | RNU6-219P      | RNA, U6 Small Nuclear 219, Pseudogene                       | 0.25  | 0.19  | NA                                                                          | NA                                     |
| 68 | PPAPDC1A       | Phospholipid Phosphatase 4                                  | 0.68  | 0.58  | NA                                                                          | NA                                     |
| 69 | MIR635         | MicroRNA 635                                                | 0.2   | 0.35  | NA                                                                          | NA                                     |
| 70 | LDHAP5         | Lactate Dehydrogenase A Pseudogene 5                        | 1.69  | 0.68  | NA                                                                          | NA                                     |
| 71 | LDHAP4         | Lactate Dehydrogenase A Pseudogene 4                        | 1.63  | 0.65  | NA                                                                          | NA                                     |
| 72 | RPL21P1        | Ribosomal Protein L21 Pseudogene 1                          | 25.49 | 33.13 | NA                                                                          | NA                                     |
| 73 | RPL24P7        | RPL24 Pseudogene 7                                          | 0.61  | 0.71  | NA                                                                          | NA                                     |
| 74 | RP11-475C16.1  | RP11-475C16.1                                               | 0.76  | 0.73  | NA                                                                          | NA                                     |
| 75 | RP11-69L16.5   | RP11-69L16.5                                                | 0.72  | 0.73  | NA                                                                          | NA                                     |
| 76 | RNU6-1203P     | RNA, U6 Small Nuclear 1203, Pseudogene                      | 5.07  | 4.18  | NA                                                                          | NA                                     |
| 77 | AC010546.1     | AC010546.1                                                  | 4.23  | 8.67  | NA                                                                          | NA                                     |
| 78 | RP1-228H13.1   | RP1-228H13.1                                                | 2.44  | 2.54  | NA                                                                          | NA                                     |
| 79 | RP11-307O1.1   | RP11-307O1.1                                                | 0.65  | 0.74  | NA                                                                          | NA                                     |
| 80 | RP11-145H9.3   | RP11-145H9.3                                                | 3.36  | 2.13  | NA                                                                          | NA                                     |
| 81 | RP11-206L10.11 | RP11-206L10.11                                              | 2.55  | 6.33  | NA                                                                          | NA                                     |
| 82 | RP11-553N16.1  | RP11-553N16.1                                               | 0.86  | 0.89  | NA                                                                          | NA                                     |
| 83 | HMG2P3         | High Mobility Group Nucleosomal Binding Domain 2 Pseudogene | 0.67  | 0.7   | NA                                                                          | NA                                     |
| 84 | RPL24P8        | RPL24 Pseudogene 8                                          | 0.71  | 0.71  | NA                                                                          | NA                                     |
| 85 | RP11-490G8.1   | RP11-490G8.1                                                | 0.71  | 0.71  | NA                                                                          | NA                                     |
| 86 | TMEM141        | Transmembrane Protein 141                                   | 0.21  | 1.26  | NA                                                                          | NA                                     |
| 87 | RP11-73G16.3   | RP11-73G16.3                                                | 0.32  | 0.31  | NA                                                                          | NA                                     |

|    |                |                                              |      |      |    |    |
|----|----------------|----------------------------------------------|------|------|----|----|
| 88 | RP1-68D18.2    | RP1-68D18.2                                  | 0.67 | 0.68 | NA | NA |
| 89 | SNORD112       | Small Nucleolar RNA, C/D Box 112             | 0.13 | 0.21 | NA | NA |
| 90 | snoU13         | Small Nucleolar RNA, C/D Box 13 Pseudogene 1 | 2.77 | 2.58 | NA | NA |
| 91 | Y_RNA          | RNA, Ro60-Associated Y3                      | 0.16 | 0.14 | NA | NA |
| 92 | RP11-121G22.3  | RP11-121G22.3                                | 0.22 | 0.22 | NA | NA |
| 93 | RP11-467L19.11 | RP11-467L19.11                               | 0.65 | 0.43 | NA | NA |
| 94 | PTP4A2P1       | PTP4A2 Pseudogene 1                          | 1.4  | 1.46 | NA | NA |
| 95 | RP11-264B14.2  | RP11-264B14.2                                | 4.02 | 8.74 | NA | NA |
| 96 | RP11-254F7.3   | RP11-254F7.3                                 | 0.17 | 0.16 | NA | NA |
